# Supplementary material for: Exercise Activates p53 and Negatively Regulates IGF-1 Pathway in Epidermis within a Skin Cancer Model
Source: PLoS One. 2016 Aug 10;11(8):e0160939. doi: 10.1371/journal.pone.0160939 (PMC4979999; doi:10.1371/journal.pone.0160939)
Supplement: S1 Dataset — (XLSX) [file pone.0160939.s001.xlsx]

## Sheet: Sheet1
Body Weight change of SENCAR mice (n=20 per group)
Experimental Time (week)	Sedentary	S.E.	Ex+PF	S.E.
0	25.85	0.854953	26.5733	0.671776
1	27.02	0.256818	26.66	0.494137
2	27.3	0.452155	27.0867	0.576018
3	27.01	0.509782	27.3733	0.558098
4	29.4	0.42374	27.3733	0.630455
5	29.32	0.525949	26.1	0.780293
6	30.2	0.53562	25.12	0.969644
7	30.81	0.809451	25.78	0.978395
8	30.7	0.496432	25.32	0.930294
9	30.37	0.526213	24.7333	1.04278
10	31.51	0.681575	26.1533	0.874336
11	32.07	0.609563	23.2333	1.13081
12	31.38	0.590254	24.9333	0.958445
13	32.36	0.709648	25.4889	1.06088
14	32.56	0.610683	25.7889	1.03191
